# Supplementary material
Source: Research Square preprint supplement (doi:10.21203/rs.3.rs-9601076/v1)
Supplement: Supplementary file 1 [file c231b2ef91e220223b9c0f8a.docx]

Tabe1. Demographic characteristics of patients and primary caregivers.

| Demography; Number (%) | | Patient | Caregivers |
| --- | --- | --- | --- |
| Age | Mean (Standard deviation) | 60.6 (13.9) | 41.4(14.3) |
| Gender | Male | 21 (36.8%) | 24 (42.1%) |
| Female | 36 (63.2%) | 33 (57.9%) |
| Marital Status | Single | 5 (8.8%) | 15 (26.3%) |
| Married | 37 (64.9%) | 40 (70.1%) |
| Widow | 11 (19.3%) | 1 (1.8%) |
| Divorced/Separated | 4 (7%) | 1(1.8%) |
| Education level | Less than high school | 12 (21.1%) | 9 (15.8%) |
| High school | 20 (35.1%) | 9 (15.8%) |
| Diploma | 6 (10.5%) | 10 (17.5%) |
| Bachelors | 15 (26.3%) | 22 (38.6%) |
| Postgraduation studies | 4 (7%) | 7 (12.3%) |
| Employment | Working | 4 (7%) | 22 (38.6%) |
| Not working | 35 (61.4%) | 30 (52.6%) |
| Retired | 18 (31.6%) | 5 (8.8%) |
| Relationship of caregiver to patient | Husband | - | 4 (7.0%) |
| Wife | - | 8 (14.0%) |
| Son | - | 20 (35.1%) |
| Daughter | - | 16 (28.1%) |
| Mother | - | 3 (5.3%) |
| Brother | - | 3 (5.3%) |
| Sister | - | 3 (5.3%) |
| Code status | Do not resuscitate (DNR) | 11 (19.3%) | - |
| Full code | 46 (80.7%) | - |
| Primary cancer diagnosis | Digestive organs | 15(26.3%) | - |
| Breast | 11(19.3%) | - |
| Respiratory system & intrathoracic organs | 7(12.3%) | - |
| Female genital organs | 6(10.5%) | - |
| Connective, subcutaneous and other soft tissues | 4(7.0%) | - |
| Urinary tract | 4(7.0%) | - |
| Thyroid and other endocrine glands | 4(7.0%) | - |
| Lip, oral cavity and pharynx | 2(3.5%) | - |
| Multiple cancers | 2(3.5%) | - |
| Lymph-nodes | 1(1.8%) | - |
| Others | 1(1.8%) | - |
| Comorbidities | Cardiovascular | 43 (75.4%) | - |
| Endocrine | 30 (52.6%) | - |
| Urogenital | 7 (12.3%) | - |
| Respiratory | 7 (12.3%) | - |
| Mental health | 5 (8.8%) | - |
| None | 6 (10.5%) | - |
| Musculoskeletal | 2 (3.5%) | - |
| Gastrointestinal | 3 (5.3%) | - |
| Palliative prognostic index (PPI) score | < or equal 4 | 26 (45.6%) | - |
| 5-6 | 21 (36.8%) | - |
| > 6 | 10 (17.5%) | - |
| Palliative performance scale (PPS) score | 30 | 16 (28.1%) | - |
| 40-50 | 26 (45.6%) | - |
| 60-80 | 15 (26.3%) | - |
| Duration of hospice care | Less than 6 months | 49 (86.0%) | - |
| 6-12 months | 4 (7.0%) | - |
| More than 1 year | 4 (7.0%) | - |
| Number of medications used | < 5 | 1(1.8) | - |
| >or equal 5 | 56 (98.2%) | - |
| Number of avoidable medications used | < 5 | 40 (70.2%) | - |
| >or equal 5 | 17 (29.8%) | - |

Table 2. Medications used among patients.

| Mean (SD) | |
| --- | --- |
| Medications used per patient | 11.5 (4.0) |
| Potentially avoidable medications per patient | 4.0(2.4) |
|  | |
| Categories of potentially avoidable medications | Number (%) |
| Medications for peptic ulcer and gastro-esophageal reflux disease | 38 (66.7%) |
| Cardiovascular medications | 35(61.1%) |
| Antidiabetic medications and Insulin products | 24(42.1%) |
| Vitamins and nutritional supplements | 22(38.6%) |
| Anticoagulant | 11(19.3%) |
| Dyslipidemia medications | 7(12.3%) |
| Medications for benign prostatic hyperplasia | 7(12.3%) |
| Medications for hyperuricemia | 4(7%) |
| Antiplatelet | 3(5.3%) |
| Electrolyte supplement | 3(5.3%) |
| Antineoplastic medications | 1(1.8%) |
| Others | 2(3.5%) |
| SD: Standard Deviation | |

Table 3. Patient questionnaire responses.

| Statement; Number (%) | | Agree | Neutral | Disagree | Total (Number) |
| --- | --- | --- | --- | --- | --- |
| A1 | I feel I may be taking some medicines I no longer need | 12 (21.4%) | 13 (23.2%) | 31 (55.4%) | 56 |
| A2 | I would like to try stopping one of my medicines to see how I feel without it | 20 (35.1%) | 5 (8.8%) | 32 (56.1%) | 57 |
| A3 | I would like my doctor to reduce the dose of one or more of my medicines | 21 (36.8%) | 7 (12.3%) | 29 (50.9%) | 57 |
| A4 | I think one or more of my medicines may not be working | 8 (14.8%) | 8 (14.8%) | 38 (70.4%) | 54 |
| A5 | I believe one or more of my medicines may be currently giving me side effects | 29 (50.9%) | 6 (10.5%) | 22 (38.6%) | 57 |
| B1 | The NHS (National Health Service) spends a lot on my medicines | Not applicable | | | |
| B2 | Taking my medicines every day is very inconvenient | 24 (42.1%) | 8 (14.0%) | 25 (43.9%) | 57 |
| B3 | I am taking a large number of medicines | 27 (47.4%) | 7 (12.3%) | 23 (40.4%) | 57 |
| B4 | My medicines are a burden to me | 24 (42.1%) | 8 (14.0%) | 25 (43.9%) | 57 |
| B5 | Sometimes I think I take too many medicines | 27 (47.4%) | 7 (12.3%) | 23 (40.4%) | 57 |
| C1 | I would be reluctant to stop a medicine that I had been taking for a long time | 33 (57.9%) | 2 (3.5%) | 22 (38.6%) | 57 |
| C2 | If one of my medicines was stopped, I would be worried about missing out on future benefits | 24 (42.1%) | 10 (17.5%) | 23 (40.4%) | 57 |
| C3 | I get stressed whenever changes are made to my medicines. | 18 (31.6%) | 8 (14.0%) | 31 (54.4%) | 57 |
| C4 | If my doctor wanted to stop a medicine, I would feel that he/she was giving up on me | 17 (29.8%) | 6 (10.5%) | 34 (59.6%) | 57 |
| I1 | I have a good understanding of the reasons I was prescribed each of my medicines. | 54 (94.7%) | 0 (0.0%) | 3 (5.3%) | 57 |
| I2 | I know exactly what medicines I am currently taking, and/or I keep an up-to-date list of my medicines | 54 (94.7%) | 0 (0.0%) | 3 (5.3%) | 57 |
| I3 | I like to know as much as possible about my medicines | 52 (91.2%) | 0 (0%) | 5 (8.8% | 57 |
| I4 | I like to be involved in making decisions about my medicines with my doctors. | 52 (91.2%) | 0 (0.0%) | 5 (8.8%) | 57 |
| I5 | I always ask my doctor, pharmacist or other healthcare professional if there is something I don’t understand about my medicines | 47 (82.5%) | 3 (5.3%) | 7 (12.3%) | 57 |
| G1 | If my doctor said it was possible, I would be willing to stop one or more of my regular medicines. | 51 (89.5%) | 5 (8.8%) | 1 (1.8%) | 57 |
| G2 | Overall, I am satisfied with my current medicines. | 51 (89.5%) | 2 (3.5%) | 4 (7.0%) | 57 |
| Statement | | Yes | No | | Total (Number) |
| S1 | Have you ever had any of your medicines stopped? | 36 (63.2%) | 21 (36.8%) | | 57 |
| S2 | Have you had a bad experience when stopping a prescribed medicine before? | 12 (36.4%) | 21 (63.6%) | | 33 |

Table 4. Caregiver questionnaire responses.

| Statement; Number (%) | | Agree | Neutral | Disagree | Total(Number) |
| --- | --- | --- | --- | --- | --- |
| A1 | I feel that the person that I care for may be taking one or more medicines that they no longer need | 5 (8.9%) | 18 (32.1%) | 33 (58.9%) | 56 |
| A2 | I would like the doctor to try stopping one of my care recipient’s medicines to see how they feel without it | 20 (35.1%) | 11 (19.3%) | 26 (45.6%) | 57 |
| A3 | I would like the doctor to reduce the dose of one or more of my care recipient’s medicines | 27 (47.4%) | 10 (17.5%) | 20 (35.1%) | 57 |
| A4 | I think one or more of my care recipient’s medicines may not be working | 8 (14.8%) | 14 (25.9%) | 32 (59.3%) | 54 |
| A5 | I believe one or more of my care recipient’s medicines may be currently giving them side effects | 34 (59.6%) | 5 (8.8%) | 18 (31.6%) | 57 |
| B1 | The NHS (National Health Service) spends a lot on my care recipient’s medicines | Not applicable | | | |
| B2 | Giving the person that I care for their medicines every day is very inconvenient. | 26 (45.6%) | 14 (24.6%) | 17 (29.8%) | 57 |
| B3 | I feel that the person I care for is taking a large number of medicines | 23 (40.4%) | 10 (17.5%) | 24 (42.1%) | 57 |
| B4 | I feel that my care recipient’s medicines are a burden to them | 26 (45.6%) | 14 (24.6%) | 17 (29.8%) | 57 |
| B5 | Sometimes I think the person I care for takes too many medicines | 23 (40.4%) | 10 (17.5%) | 24 (42.1%) | 57 |
| C1 | I would be reluctant to stop one of my care recipient’s medicines that they had been taking for a long time | 25 (43.9%) | 7  (12.3%) | 25 (43.9%) | 57 |
| C2 | If one of my recipient’s medicines was stopped, I would be worried about missing out on future benefits | 29 (50.9%) | 13 (22.8%) | 15 (26.3%) | 57 |
| C3 | I get stressed whenever changes are made to my care recipient’s medicines. | 15 (26.3%) | 13 (22.8%) | 29 (50.9%) | 57 |
| C4 | I feel that if I agreed to stopping one of my care recipient’s medicines then this is giving up on them | 16 (28.1%) | 8 (14.0%) | 33 (57.9%) | 57 |
| I1 | I have a good understanding of the reasons my care recipient was prescribed each of their medicines | 50 (87.7%) | 5 (8.8%) | 2 (3.5%) | 57 |
| I2 | I know exactly what medicines the person that I care for is currently taking and/or I have an up to date list of their medicines | 50 (87.7%) | 5 (8.8%) | 2 (3.5%) | 57 |
| I3 | I like to know as much as possible about my care recipient’s medicines | 50 (87.7%) | 6 (10.5%) | 1 (1.8%) | 57 |
| I4 | I like to be involved in making decisions about my care recipient’s medicines with their doctors | 50 (87.7%) | 6 (10.5%) | 1 (1.8%) | 57 |
| I5 | I always ask the doctor, pharmacist or other health care professional if there is something I don’t understand about my care recipient’s medicines | 42 (73.7%) | 7 (12.3%) | 8 (14.0%) | 57 |
| G1 | If their doctor said it was possible, I would be willing to stop one or more of my care recipient’s medicines | 53 (93.0%) | 3 (5.3%) | 1 (1.8%) | 57 |
| G2 | Overall, I am satisfied with my care recipient’s current medicines | 45 (78.9%) | 9 (15.8%) | 3 (5.3%) | 57 |
| Statement | | Statement | No | | Total (Number) |
| S1 | Have you ever had any of your care recipient’s medicines stopped? | 40 (70.2%) | 17 (29.8%) | | 57 |
| S2 | Have your care recipient had a bad experience when stopping a prescribed medicine before? | 17 (51.5%) | 16 (48.5%) | | 33 |

Table 5. Agreement between the responses of patients and the caregiver to the questionnaire.

| Factors | | Kendall's tau-b | P value |
| --- | --- | --- | --- |
| Appropriateness | A1 | 0.56 | < 0.05 |
| A2 | 0.27 | < 0.05 |
| A3 | 0.34 | < 0.05 |
| A4 | 0.33 | < 0.05 |
| A5 | 0.45 | ˂0.001 |
| Burden | B1 | Not applicable | |
| B2 | 0.33 | < 0.05 |
| B3 | 0.38 | ˂0.001 |
| B4 | 0.33 | < 0.05 |
| B5 | 0.38 | 0.001 |
| Concern | C1 | 0.48 | ˂0.001 |
| C2 | 0.42 | 0.001 |
| C3 | 0.16 | 0.19 |
| C4 | 0.39 | < 0.05 |
| Involvement | I1 | -0.09 | 0.12 |
| I2 | -0.09 | 0.12 |
| I3 | -0.09 | 0.12 |
| I4 | 0.44 | 0.08 |
| I5 | 0.09 | 0.41 |
| Global | G1 | 0.59 | 0.07 |
| G2 | 0.15 | 0.40 |
| Statements | S1 | 0.69 | < 0.001 |
| S2 | 0.61 | < 0.05 |
| For all Kendall’s tau-b value, P value of < 0.05 was consider as statically significant. A Kendall’s tau-b value of (+) indicates a positive association, while a value of (–) indicates a negative association and a value of 0 indicates no association between the variables. Strength of association: 0.00 – 0.10: Very weak association, 0.11 – 0.30: Weak association, 0.31 – 0.50: Moderate association and greater than 0.50: Strong association. | | | |

Table 6. Barriers to deprescribing

| Barriers to Depressing; Number (%) | Patient | | | Caregiver | | | Agreement | |
| --- | --- | --- | --- | --- | --- | --- | --- | --- |
| Yes | No | I don’t know | Yes | No | I don’t know | Kendall's tau-b | P value |
| My confidence in the importance of the medication for me | 41 (71.9%) | 14 (24.6%) | 2 (3.5%) | 41 (71.9%) | 12 (21.1%) | 4 (7.0%) | 0.54 | < 0.05 |
| Fear of withdrawal effects if I stop the medication | 32 (56.1%) | 23 (40.4%) | 2 (3.5%) | 33 (57.9%) | 19 (33.3%) | 5 (8.8%) | 0.56 | < 0.05 |
| Advice from others to continue taking the medication | 11 (19.3%) | 40 (70.2%) | 6 (10.5%) | 23 (40.4%) | 27 (47.4%) | 7 (12.3%) | 0.41 | < 0.05 |
| Taking the medication for a long period of time | 33 (57.9%) | 22 (38.6%) | 2 (3.5%) | 25 (43.9%) | 25 (43.9%) | 7 (12.3%) | 0.48 | < 0.05 |
| Feeling that I am in good health | 31 (54.4%) | 24 (42.1%) | 2 (3.5%) | 38 (66.7%) | 16 (28.1%) | 3 (5.3%) | 0.51 | < 0.05 |
| Feeling that I will lose some expected benefits in the future | 24 (42.1%) | 23 (40.4%) | 10 (17.5%) | 28 (49.1%) | 17 (29.8%) | 12 (21.1%) | 0.42 | < 0.05 |

Table 7. Facilitator to deprescribing

| Facilitator to deprescribing  Number (%) | Patient | | | Caregiver | | | Kendall's tau-b | P value |
| --- | --- | --- | --- | --- | --- | --- | --- | --- |
| yes | No | I don’t know | Yes | No | I don’t know |
| Desire to reduce the number of medications I take | 27 (47.4%) | 23 (40.4%) | 7 (12.3%) | 23 (40.4%) | 24 (42.1%) | 10 (17.5%) | 0.38 | < 0.05 |
| Side effects of the medication | 29 (50.9%) | 22 (38.6%) | 6 (10.5%) | 34 (59.6%) | 18 (31.6%) | 5 (8.8%) | 0.45 | < 0.05 |
| Fear of becoming dependent due to taking the medication | 25 (43.9%) | 28 (49.1%) | 4 (7.0%) | 26 (45.6%) | 24 (42.1%) | 7 (12.3%) | 0.31 | < 0.05 |
| Lack of trust in the doctor who prescribed the medication | 7 (12.3%) | 47 (82.5%) | 3 (5.3%) | 8 (14.0%) | 42 (73.7%) | 7 (12.3%) | -0.01 | 0.979 |
| If I feel that my medications may interact with each other due to their number | 29 (50.9%) | 16 (28.1%) | 12 (21.1%) | 30 (52.6%) | 18 (31.6%) | 9 (15.8%) | 0.45 | < 0.05 |
